# Supplementary material for: A phenotype-based forward genetic screen identifies Dnajb6 as a sick sinus syndrome gene
Source: eLife. 2022 Oct 18;11:e77327. doi: 10.7554/eLife.77327 (PMC9642998; doi:10.7554/eLife.77327)
Supplement: Figure 7—source data 1. [file elife-77327-fig7-data1.xlsx]

## Sheet: Significant-DEGs
ID	log2FoldChange	pvalue	padj	Dnajb6+/--3	Dnajb6+/--2	Dnajb6+/--1	WT-3	WT-2	WT-1	Gene.name
ENSMUSG00000042385	-5.81015	1.06e-05	0.00514396	2.15347	1.01404	0	151.313	11.433	12.746	Gzmk
ENSMUSG00000026285	-3.98178	0.000215337	0.0275814	2.15347	3.04212	3.02577	108.787	6.66924	14.7069	Pdcd1
ENSMUSG00000024670	-3.57112	0.000654012	0.0491264	3.2302	2.02808	8.06872	134.5	9.52748	14.7069	Cd6
ENSMUSG00000015437	-3.34535	0.000382976	0.0380809	9.69059	4.05616	4.03436	147.357	17.1495	15.6874	Gzmb
ENSMUSG00000056290	-3.32008	7.27e-05	0.0142643	20.4579	14.1966	23.1976	481.629	30.4879	65.6908	Ms4a4b
ENSMUSG00000068606	-3.23057	0.000264943	0.0304276	15.0743	13.1825	20.1718	388.666	20.9605	45.1012	Gm4841
ENSMUSG00000063388	-3.05659	0.000389829	0.0382589	11.8441	12.1685	16.1374	274.934	17.1495	42.1598	BC023105
ENSMUSG00000004612	-2.96539	0.000329826	0.0348601	30.1485	16.2247	14.1203	386.688	31.4407	53.9253	Nkg7
ENSMUSG00000024675	-2.8216	0.000524833	0.0436177	7.53713	9.12637	19.1632	195.816	32.3934	25.492	Ms4a4c
ENSMUSG00000045903	-2.56514	4.32e-07	0.000652561	38.7624	18.2527	18.1546	68.239	202.935	172.561	Npas4
ENSMUSG00000023000	-2.52173	4.03e-06	0.0025399	12.9208	13.1825	10.0859	79.1177	98.133	30.3943	Dhh
ENSMUSG00000042489	-2.44505	4.99e-05	0.0114972	11.8441	7.09829	11.0945	73.1839	68.5979	21.5701	Clspn
ENSMUSG00000023940	-2.42035	0.00028039	0.0313913	3.2302	5.0702	6.05154	37.5809	21.9132	17.6483	Sgo1
ENSMUSG00000030677	-2.28582	0.000669452	0.0495985	8.61386	13.1825	19.1632	115.71	64.7869	19.6092	Kif22
ENSMUSG00000018486	-2.27379	3.18e-05	0.00873239	16.151	12.1685	25.2148	57.3603	148.629	52.9449	Wnt9b
ENSMUSG00000031004	-2.20641	0.0001	0.0182049	75.3713	74.025	116.996	717.004	406.823	105.89	Mki67
ENSMUSG00000001228	-2.16575	0.000129865	0.0211052	31.2252	27.3791	30.2577	215.596	143.865	39.2184	Uhrf1
ENSMUSG00000019890	-2.03759	1.54e-10	1.17e-06	143.205	105.46	109.936	317.46	676.451	477.484	Nts
ENSMUSG00000032218	-1.96267	0.000382166	0.0380809	15.0743	16.2247	13.1117	98.8971	42.8737	31.3747	Ccnb2
ENSMUSG00000027469	-1.94982	0.000450604	0.040783	23.6881	19.2668	31.2663	156.257	95.2748	35.2966	Tpx2
ENSMUSG00000020649	-1.86425	0.000181602	0.0251811	27.9951	29.4072	44.378	197.794	118.141	54.9058	Rrm2
ENSMUSG00000017724	-1.83053	2.94e-05	0.00837454	25.8416	21.2949	31.2663	62.3052	142.912	73.5345	Etv4
ENSMUSG00000042357	-1.81577	3.39e-05	0.00899835	20.4579	21.2949	23.1976	64.2831	114.33	50.0035	Gjb5
ENSMUSG00000002289	-1.81106	0.000175673	0.0250483	29.0718	77.0671	33.2835	89.9964	217.227	182.366	Angptl4
ENSMUSG00000069793	-1.72143	0.000101446	0.0182529	40.9158	48.674	57.4896	212.629	201.03	71.5736	Slfn9
ENSMUSG00000031937	-1.70405	5.71e-05	0.0126812	17.2277	24.337	12.1031	48.4596	72.4088	53.9253	Vstm5
ENSMUSG00000021062	-1.69176	0.000620507	0.0470815	53.8366	31.4353	57.4896	114.721	265.817	80.3977	Rab15
ENSMUSG00000071714	-1.66869	0.000129639	0.0211052	44.146	46.6459	40.3436	220.541	123.857	72.5541	Csf2rb2
ENSMUSG00000001494	-1.66762	0.000113334	0.0196888	89.3688	100.39	51.4381	370.864	266.769	128.44	Sost
ENSMUSG00000100658	-1.52502	3.72e-05	0.00965431	34.4554	21.2949	27.2319	90.9854	89.5583	57.8472	F730311O21Rik
ENSMUSG00000026628	-1.51893	0.000262575	0.0304276	169.047	222.075	72.6185	296.691	553.547	478.465	Atf3
ENSMUSG00000020407	-1.51342	3.22e-06	0.00243488	69.9876	79.0952	66.5669	168.125	293.446	153.932	Upp1
ENSMUSG00000042734	-1.51223	5.89e-06	0.00326734	129.208	76.0531	95.8161	283.835	381.099	193.151	Ttc9
ENSMUSG00000026070	-1.49113	0.000252764	0.0304276	45.2228	60.8425	31.2663	153.291	157.203	75.4954	Il18r1
ENSMUSG00000013584	-1.47311	1.15e-05	0.00519814	104.443	178.471	93.7989	410.423	392.532	243.154	Aldh1a2
ENSMUSG00000043110	-1.46872	0.000183269	0.0251812	108.75	182.527	92.7903	538	242.951	282.373	Lrrn4
ENSMUSG00000071713	-1.45296	0.000270438	0.030688	120.594	99.376	102.876	467.783	261.053	154.913	Csf2rb
ENSMUSG00000086769	-1.38429	6.04e-05	0.0129294	35.5322	32.4493	27.2319	99.8861	87.6528	60.7885	Gm15587
ENSMUSG00000074802	-1.35875	0.000449334	0.040783	27.9951	39.5476	25.2148	80.1067	102.897	54.9058	Gas2l3
ENSMUSG00000027533	-1.31943	0.000293461	0.0321403	1639.86	1548.44	1304.11	5570.87	3809.09	1831.5	Fabp5
ENSMUSG00000030000	-1.29672	1.55e-05	0.00586655	36.6089	30.4212	30.2577	87.0295	75.2671	76.4759	Add2
ENSMUSG00000029664	-1.29669	0.000548971	0.0449726	27.9951	28.3931	30.2577	78.1287	87.6528	47.0621	Tfpi2
ENSMUSG00000054675	-1.2854	3.96e-07	0.000652561	261.646	305.226	265.259	811.945	749.813	466.699	Tmem119
ENSMUSG00000020911	-1.251	1.4e-06	0.00137628	117.364	149.064	178.52	360.975	421.115	277.47	Krt19
ENSMUSG00000010797	-1.23352	0.000158839	0.0233077	29.0718	38.5336	29.2491	87.0295	78.1253	62.7495	Wnt2
ENSMUSG00000041559	-1.20472	6.1e-05	0.0129294	220.73	355.928	165.409	524.155	640.247	546.116	Fmod
ENSMUSG00000020733	-1.19105	0.000252515	0.0304276	162.587	170.359	177.512	585.471	310.596	269.627	Slc9a3r1
ENSMUSG00000037379	-1.18557	0.000355499	0.0369347	48.453	42.5897	39.335	128.566	95.2748	72.5541	Spon2
ENSMUSG00000039115	-1.17917	0.000152578	0.0226085	527.599	465.445	475.046	1642.68	969.897	711.814	Itga9
ENSMUSG00000034382	-1.17738	2.26e-05	0.00725815	60.297	53.7442	44.378	139.445	102.897	115.694	AI661453
ENSMUSG00000036098	-1.17098	0.000550019	0.0449726	82.9084	162.247	90.7731	322.405	232.471	201.975	Myrf
ENSMUSG00000042985	-1.15073	8.87e-07	0.0012193	630.965	966.381	658.609	1974.98	1451.04	1583.44	Upk3b
ENSMUSG00000026547	-1.15021	0.000147167	0.022598	2306.36	2650.7	2474.07	5976.35	7368.55	3148.26	Tagln2
ENSMUSG00000038168	-1.12269	0.000320824	0.0343896	55.9901	61.8565	52.4467	147.357	138.148	85.3	P3h2
ENSMUSG00000034684	-1.10421	0.000204467	0.027108	490.99	501.95	445.797	942.49	1479.62	670.635	Sema3f
ENSMUSG00000029163	-1.10258	1.14e-05	0.00519814	587.896	549.61	607.171	1468.62	1443.41	834.372	Emilin1
ENSMUSG00000027435	-1.09937	1.8e-06	0.00160339	1404.06	1673.17	1227.45	3380.3	3562.32	2280.55	Cd93
ENSMUSG00000048120	-1.09381	0.000180514	0.0251811	765.557	709.829	541.613	1933.44	1431.03	940.261	Entpd1
ENSMUSG00000032231	-1.0932	0.000238075	0.0292541	2964.25	2372.86	2342.95	5504.61	7522.9	3357.1	Anxa2
ENSMUSG00000040829	-1.07927	0.000518538	0.0435554	373.626	406.63	354.015	1177.86	700.27	518.663	Zmynd15
ENSMUSG00000073599	-1.07347	0.000224052	0.0279861	586.819	509.049	458.908	1222.37	1379.58	669.654	Ecscr
ENSMUSG00000029999	-1.06676	0.000617665	0.0470815	83.9852	73.0109	50.4295	165.158	160.062	108.831	Tgfa
ENSMUSG00000070720	-1.06123	4.07e-05	0.0102568	132.438	162.247	113.971	227.463	350.611	274.529	Tmem200b
ENSMUSG00000022868	-1.05678	1.3e-05	0.00561478	2378.5	1898.28	1910.27	5738.01	3583.29	3549.27	Ahsg
ENSMUSG00000020773	-1.03559	3.06e-06	0.00243488	956.139	1110.37	944.04	2261.78	2404.74	1505.01	Trim47
ENSMUSG00000019464	-1.02747	0.000416731	0.0393655	49.5297	47.6599	45.3866	83.0736	119.094	88.2414	Ptger1
ENSMUSG00000070348	-1.02526	0.000450626	0.040783	587.896	677.379	642.472	1746.52	1343.37	793.192	Ccnd1
ENSMUSG00000045312	-1.02298	6.43e-05	0.0132934	185.198	129.797	168.435	342.184	388.721	250.998	Lhfpl2
ENSMUSG00000009687	-1.01279	0.000207536	0.0271175	1028.28	840.64	901.68	2200.46	2214.19	1175.57	Fxyd5
ENSMUSG00000028776	-1.00457	2.73e-05	0.00792455	1189.79	1116.46	1092.3	2534.73	2728.67	1555.01	Tinagl1
ENSMUSG00000070802	1.00009	0.000518723	0.0435554	191.658	205.85	176.503	92.9633	66.6924	127.46	Pnmal2
ENSMUSG00000032064	1.00059	1.77e-05	0.00635209	404.852	403.588	410.496	219.552	146.723	243.154	Dixdc1
ENSMUSG00000005268	1.01464	3.77e-05	0.00965431	177.661	183.541	242.062	83.0736	106.708	108.831	Prlr
ENSMUSG00000030158	1.02049	0.000656579	0.0491264	65.6807	68.9548	80.6872	37.5809	33.3462	35.2966	Clec12b
ENSMUSG00000020102	1.0412	0.000376312	0.0379611	454.381	488.768	602.128	320.427	158.156	272.568	Slc16a7
ENSMUSG00000038550	1.04804	1.46e-06	0.00137628	548.057	596.256	470.003	317.46	213.416	250.017	Ciart
ENSMUSG00000029563	1.06091	1.96e-05	0.00674829	882.921	749.376	658.609	458.883	267.722	371.594	Foxp2
ENSMUSG00000037143	1.09079	0.00028531	0.0317072	89.3688	81.1233	76.6528	36.5919	32.3934	47.0621	Cfap61
ENSMUSG00000106951	1.09724	4.71e-05	0.0112954	206.733	156.162	144.228	76.1508	66.6924	94.1242	5930430L01Rik
ENSMUSG00000020435	1.09919	0.000261514	0.0304276	778.478	877.145	960.178	375.809	262.006	583.374	Osbp2
ENSMUSG00000085779	1.15332	6.52e-08	0.000197205	2632.61	2139.63	2106.94	853.482	948.937	1290.29	Atcayos
ENSMUSG00000031618	1.16653	5.05e-05	0.0114972	555.594	543.526	509.338	266.033	145.77	304.923	Nr3c2
ENSMUSG00000059742	1.20981	8.32e-06	0.00433571	188.428	130.811	161.374	69.228	57.1649	81.3782	Kcnh7
ENSMUSG00000037996	1.2658	0.000623018	0.0470815	104.443	78.0812	113.971	24.7243	53.3539	45.1012	Slc24a2
ENSMUSG00000057719	1.30862	0.000464172	0.0415118	80.755	90.2496	89.7645	25.7133	26.6769	52.9449	Sh3rf2
ENSMUSG00000060548	1.31562	2.23e-05	0.00725815	234.728	221.061	325.775	88.0184	80.9836	145.108	Tnfrsf19
ENSMUSG00000042793	1.34612	3.55e-07	0.000652561	2817.81	2637.52	2524.5	660.633	1232.86	1245.18	Lgr6
ENSMUSG00000042851	1.34622	5.74e-06	0.00326734	397.314	411.701	341.912	181.971	91.4638	179.424	Zc3h6
ENSMUSG00000103693	1.37684	0.000609011	0.0470368	198.119	147.036	96.8246	81.0956	37.1572	51.9644	Gm37529
ENSMUSG00000050296	1.40349	0.000439857	0.040783	77.5248	92.2777	113.971	27.6912	24.7714	54.9058	Abca12
ENSMUSG00000030757	1.46125	0.000188613	0.025682	162.587	139.938	76.6528	47.4706	32.3934	57.8472	Zkscan2
ENSMUSG00000078161	1.4838	0.000449108	0.040783	96.9059	84.1654	81.6958	40.5478	14.2912	39.2184	Erich3
ENSMUSG00000050840	1.5183	1.37e-06	0.00137628	153.973	171.373	210.795	51.4265	48.5901	87.261	Cdh20
ENSMUSG00000044067	1.52162	1.45e-05	0.00575905	102.29	85.1794	61.524	24.7243	28.5824	33.3356	Gpr22
ENSMUSG00000079105	1.5608	0.000476575	0.0418776	122.748	285.96	302.577	48.4596	120.046	72.5541	C7
ENSMUSG00000110218	1.59314	3.83e-07	0.000652561	97.9827	105.46	75.6443	26.7022	31.4407	34.3161	Gm20219
ENSMUSG00000004360	1.61419	4.17e-05	0.0103324	101.213	143.994	67.5755	25.7133	35.2517	41.1793	9330159F19Rik
ENSMUSG00000003934	1.63294	7.88e-05	0.0148877	910.916	713.885	1296.04	273.945	160.062	507.878	Efnb3
ENSMUSG00000079941	1.75783	0.000103891	0.018473	538.366	155.148	465.969	121.643	80.0308	141.186	Gm11273
ENSMUSG00000030427	1.85483	0.000132408	0.0212895	45.2228	38.5336	64.5498	20.7684	9.52748	10.7851	Lilra6
ENSMUSG00000052316	2.01083	6.05e-06	0.00326734	66.7574	50.702	70.6013	7.91177	18.1022	20.5897	Lrrc15
ENSMUSG00000085521	2.98923	1.32e-06	0.00137628	31.2252	33.4634	28.2405	5.93383	2.85824	2.94138	4930526A20Rik
ENSMUSG00000078249	3.41356	2.5e-05	0.00770589	85.0619	100.39	12.1031	9.88971	5.71649	2.94138	Hmga1b
ENSMUSG00000042962	3.82886	6.8e-05	0.01371	1402.98	623.635	89.7645	44.5037	50.4956	53.9253	Gm5436
ENSMUSG00000080242	3.8294	0.000123061	0.0204389	99.0594	137.91	11.0945	0	7.62198	9.8046	Gm15487
ENSMUSG00000044645	4.03976	0.000134849	0.0213977	187.351	82.1373	2.01718	4.94486	7.62198	3.92184	Gm7334
ENSMUSG00000091957	4.61302	4.49e-05	0.0109464	725.718	844.696	31.2663	24.7243	15.244	25.492	Rps2-ps10
